# Supplementary material
Source: publisher figshare collection journal article supplement (https://gsapubs.figshare.com/ndownloader/files/23316743)
Supplement: Supplementary file 1 [file 23316743]

## Sheet: Sheet1
Table S7. Summary of Cretaceous stratigraphic age and thickness for the Mackenzie Plain, NWT
				Minimum	Maximum
Formation	Description	Stage	Age	Thickness	Thickness
			(Ma)	(m)	(m)
Western Mackenzie Plain (JPCPC3, JPCPC4, 10FNA066)
Martin House	siltstone/shale/minor glauconite sand	Late Aptian to Albian	~112	100	160
Arctic Red	shale with minor bentonite	Early to late Albian	~110 - 100	350	>1000
unconformity
Slater River	shale interbedded with sandstone	Early Cenomanian	~99 - 95	400	500
Trevor	fine to coarse grained (locally conglomeratic) sandstone. Shale interbeds	Late Cenomanian to Middle Turonian	~95 -91	350	800
unconformity
Eastern Mackenzie Plain (JP019, 10FNARL008)
Martin House	siltstone/shale/minor glauconite sand	Late Aptian to Albian	~112	20	40
Arctic Red	shale with minor bentonite	Early to late Albian	~110 - 105	150	>400
unconformity
Slater River	shale interbedded with minor sandstone and bentonite	Cenomanian to Coniacian	99-86	350	720
Little Bear	shale coarsening upwards to sand	Late Coniacian to Santonian	~87 - 83?	285	500
	unconformity?
	more developed sand bodies	Santonian to Campanian	~83 - 70 ?
unconformity? Gradational contact?
East Fork	shale and siltstone	Late Campanian to Maastrichtian	~72 - 66	0	200
unconformity
Keele Arch/Brackett Basin (Husky7)
Martin House	siltstone/shale/minor glauconite sand	Late Aptian to Albian	~112	0	?
Arctic Red	shale with minor bentonite	Early to late Albian	~110 - 105	0	?
unconformity
Slater River	shale interbedded with sandstone	Turonian to Coniacian	~94 - 86	250	400
Little Bear	shale coarsening upwards to sand	Late Coniacian to Santonian	~87 - 83?	285	500
	unconformity
	more developed sand bodies	Santonian to Campanian	~83 - 70 ?
unconformity? Gradational contact?
East Fork	shale and siltstone	Late Campanian to Maastrichtian	~72 - 66	500	850
Summit Creek	coarsening upwards deltaic depostis followed by fining upwards fluvial systems	Maastrichtian to Paleocene	~66 - ?	200	470
unconformity
